# Supplementary material for: Targeting the anti-apoptotic Bcl-2 family proteins: machine learning virtual screening and biological evaluation of new small molecules
Source: PubMed Central journal article supplement (PMC8899577; doi:10.7150/thno.64233), 2022-02-28
Supplement: thnov12p2427s1.pdf [file thnov12p2427s1.pdf]

## Supplementary Information

### Targeting the anti-apoptotic Bcl-2 family proteins: machine learning virtual screening and biological evaluation of new small molecules

Elisabetta Valentini<sup>1,\*</sup>, Simona D'Aguanno<sup>1,\*</sup>, Marta Di Martile<sup>1,\*</sup>, Camilla Montesano<sup>2</sup>, Virginia Ferraresi<sup>3</sup>, Alexandros Patsilidakos<sup>4,5</sup>, Manuela Sabatino<sup>4,5</sup>, Lorenzo Antonini<sup>4,5</sup>, Martina Chiacchiarini<sup>1</sup>, Sergio Valente<sup>5</sup>, Antonello Mai<sup>5,6</sup>, Gianni Colotti<sup>7</sup>, Rino Ragno<sup>4,5</sup>✉, Daniela Triscioglio<sup>1,7</sup>✉, Donatella Del Bufalo<sup>1</sup>✉

<sup>1</sup>Preclinical Models and New Therapeutic Agents Unit, IRCCS Regina Elena National Cancer Institute, Via Elio Chianesi 53, Rome, Italy;

<sup>2</sup>Department of Chemistry, Sapienza University of Rome, P.le Aldo Moro 5, Rome, Italy;

<sup>3</sup>Sarcomas and Rare Tumours Departmental Unit- IRCCS Regina Elena National Cancer Institute, Via Elio Chianesi 53, Rome, Italy;

<sup>4</sup>Rome Center for Molecular Design, Department of Drug Chemistry and Technologies, Sapienza University of Rome, P.le Aldo Moro 5, Rome, Italy;

<sup>5</sup>Department of Drug Chemistry and Technologies, Sapienza University of Rome, P.le Aldo Moro 5, Rome, Italy;

<sup>6</sup>Pasteur Institute, Cenci Bolognetti Foundation, Sapienza University of Rome, P.le Aldo Moro 5, Rome, Italy;

<sup>7</sup>Institute of Molecular Biology and Pathology, Italian National Research Council, P.le A.Moro 5, Rome, Italy.

\* Equal contribution as first authors: Elisabetta Valentini, Simona D'Aguanno, Marta Di Martile

✉ Corresponding authors: Donatella Del Bufalo, Daniela Triscioglio, Rino Ragno

### SUPPLEMENTARY METHODS

#### Virtual screening protocol

A ligand-based (LB) VS protocol was set up to select potential Bcl-2 modulators compounds from a ~ 1 million of compounds commercial database. The study started with the compilation of a Bcl-2 modulators dataset interrogating the publicly available ChEMBL and PubChem databases and retrieving all records related to ligands assayed against Bcl-2 protein by either biochemical or cell-

35 based methods. The Bcl-2 modulators dataset was subjected to a pruning procedure and the cleaned  
36 dataset was opportunely divided into different training sets for the developing of predictive QSAR  
37 models to be used as filtering tools to rank a commercial small molecules database and acquire the  
38 most promising compounds to be experimentally tested as potential Bcl-2 modulators.

39 **Data collection and pruning.** A Bcl-2 modulators database was compiled from ChEMBL version  
40 22 database. Human apoptosis regulator Bcl-2 bioactivity records, referred with the target identifier  
41 CHEMBL4860, were retrieved and processed to compile a dataset (BCL2M<sub>ChEMBL</sub> dataset). The  
42 initial BCL2M<sub>ChEMBL</sub> dataset of 1762 activity records was then subjected to a cleaning procedure  
43 (see material and methods section). A cleaned BCL2M<sub>ChEMBL</sub> dataset of 1634 compounds was  
44 obtained and divided into subsets: the binding assay set (BA) containing 1570 molecules and the  
45 functional assay one (FA) of 64 compounds. The two datasets (BA-BCL2M<sub>ChEMBL</sub> and FA-  
46 BCL2M<sub>ChEMBL</sub>) were then used to build binary classification models.

47 **Binary classification BA set (BA<sub>Class</sub>) and FA Set (FA<sub>Class</sub>).** The 1570 BA-BCL2M<sub>ChEMBL</sub>  
48 compounds were divided into actives and non-actives (inactives) on the basis of a biological activity  
49 cutoff value of 1  $\mu$ M (pAct = 6). Consequently 1167 were labeled actives as displayed  $K_i$ ,  $K_d$ ,  $IC_{50}$ ,  
50 or  $EC_{50}$  values lower than 1  $\mu$ M; whereas non-actives ( $K_i$ ,  $K_d$  and  $IC_{50}$ , or  $EC_{50} \geq 1 \mu$ M) resulted to  
51 be 403. To balance actives and inactives ratio (actives/inactives = 2.90), further 923 molecules  
52 tagged as BCL2M were retrieved from PubChem (PC dataset) repository (geneID: 596). Cleaning  
53 of the PC dataset as above described led to a BCL2M<sub>PC</sub> dataset of 602 unique compounds that were  
54 merged with the BCL2M<sub>ChEMBL</sub> dataset leading to a more balanced actives/inactives ratio of 1.19  
55 with 1180 active and 992 inactive compounds, respectively. A total number of 2172 datapoints was  
56 compiled for the BA<sub>Class</sub>. In a similar fashion way the FA-BCL2M<sub>ChEMBL</sub> were classified into  
57 actives and inactives leading to a fully balanced training set composed of 32 active and 32 inactive  
58 molecules.

59 **QSAR models building.** QSAR were developed with ML techniques considering either  
60 classification methods. Molecular descriptor and fingerprints (DESCs and FPs) as calculated by  
61 means of RDKit (see experimental) were used as independent data ( $X_{DESCs}$  and  $X_{FPs}$ ) in the  
62 following classification models' derivation, furthermore a combination of DESCs and FPs as a  
63 unique hybrid molecular descriptor (Hybrid) matrix were also used.

64 **Evaluation of classification models.** Several ML classification models were built with K-nearest  
65 neighbors (KNN) and logistic regression (LR), gradient boosting (GB), support vector machine  
66 (SVM) and random forest (RF) using as dependent variable vector the above defined datasets  
67 BA<sub>Class</sub> and FA<sub>Class</sub> datasets. Considering seven ML algorithm for each dataset a total of forty-two

68 classification models were derived as datasets' compounds were represented with FPs, DESCs and  
69 Hybrid (**Table S1-S6**).

70 As many of the under building models using default Hyperparameters settings displayed good  
71 values of accuracy (ACC) and Matthews correlation coefficient (MCC), to save computation time  
72 no hyperparameters' optimization was applied. As alternative to the model's optimization six  
73 further final consensus models were built, by means of the voting classifier utility of scikit-learn  
74 (sklearn) library [1] with the soft voting switch [2] (**Table S7**).

75 All consensus models showed a good propensity to classify actives from inactives, in particular FPs  
76 derived models displayed higher ACC and MCC values than those obtained with DESCs. In  
77 particular, the models obtained with the Hybrid combination displayed the highest internal stability  
78 and predictive power.

79 **Molecular docking assessment.** Any molecular docking program should to be evaluated for its  
80 ability in reproducing experimental co-crystallized complexes (when available). In this case as  
81 venetoclax was used as reference compound four complexes of it with *wild type* and mutate form of  
82 Bcl-2 were used (pdb entry codes: 6O0K, 6O0L, 6O0M\_2 and 6O0P). To select the best performing  
83 docking program (DP) smina [3] and Plants [4] were selected as free for academics and among the  
84 most used. Based on the available feature (F) and scoring function (FS) nine different DP/F/FS  
85 combination were applied. On the basis of a random self-docking procedure [5] the smina program  
86 with the VINA scoring function as proved to be the most effective in reproducing the venetoclax  
87 experimental co-crystallized poses in four different complexes (**Table S11**).

88 As the lead compound IS21 was found to display to be active against the three Bcl-2 family proteins  
89 (Bcl-2, Bcl-xL and Mcl-1) a further assessment was performed for the Smina program by using  
90 complexes with a ligand able to bind all the three proteins. A survey on ChEMBL revealed  
91 navitoclax as tested for either Bcl-2 [6], Bcl-xL [6] or Mcl-1 [7], and being navitoclax structurally  
92 related to venetoclax the co-cristallized complexes with Bcl-2 (pdb entry code 6QGH) and Bcl-xL  
93 (pdb entry code 4QNQ) were retrieved from PDB. Docking assessment by means of re-docking and  
94 cross-docking experiments was run on the 6QGH and 4QNQ confirming the Smina/VINA  
95 combination the most suitable one (**Tables S12 and S13**).

## 96 **Computational procedures**

97 **Data collection and pruning.** All BCL2M records were retrieved from ChEMBL and PubChem.  
98 Human apoptosis regulator Bcl-2 bioactivity records, referred with the target identifier. The initial  
99 BCL2M<sub>ChEMBL</sub> dataset was then subjected to a pruning procedure as following:

- 100 • compounds whose biological activity value was not expressed in IC<sub>50</sub>, K<sub>i</sub>, EC<sub>50</sub>, GI<sub>50</sub>, K<sub>d</sub>, or  
101 biological data outside typical range were deleted;

102 • duplicates were aggregated by including only average pAct values showing standard  
103 deviations lower than 0.5;

104 • mixtures, inorganics, and organometallics were removed;

105 • all biological activities were converted into molar unit and transformed in logarithm scale by  
106 the p function ( $pAct = \log([M]^{-1})$ );

107 • elimination of records flagged with alerts as “outside typical range” and “nonstandard unit  
108 of type” in the “data\_validity\_comment” field

109 The cleaned BCL2M<sub>CHEMBL</sub> dataset was divided into subsets: the binding assay set (BA) and the  
110 functional assay one (FA). The two sets (BA-BCL2M and FA-BCL2M) were then used to build  
111 binary classification and regression models.

112 **Binary classification BA set ( $BA_{Class}$ ) and FA Set ( $FA_{Class}$ ).** The BA-BCL2M compounds were  
113 divided into actives and non-actives (inactives) on the basis of an arbitrary pAct values of 6 (1  $\mu$ M).  
114 In a similar fashion way the FA-BCL2M were classified into actives and inactives.

115 **Molecule numerical representation.** To build the QSAR models molecules were described in  
116 chemical and molecular representation using, molecular descriptors (DESCs, chemical description)  
117 and molecular fingerprints (Fps, structural description), respectively. DESCs and Fps were  
118 calculated by means of the RDKit python library (v. 2017.09.1). In particular Morgan type  
119 fingerprints were used by setting to 2048 the number of bits while using radius 3. Whereas all 200  
120 RDKit descriptors were calculated for each molecule and scaled by means of the min-max method.  
121 DESCs and Fps were finally organized in matrixes to be used as independent data ( $X_{DESCs}$  and  $X_{Fps}$ )  
122 in the classification and regression models’ derivation.

123 **QSARs’ building.** All the steps related to the development of QSAR classification models and their  
124 VS application implemented in the Python version 3.5 programming environment using anaconda.  
125 The related code was written and executed in the jupyter-notebook [1] platform by including several  
126 libraries. Among the latter can be listed: numpy [2] and scipy [3] for numerical computing, pandas  
127 [4, 5] for data wrangling, scikit-learn for ML elaboration, matplotlib [6] and plotly [7] for graphical  
128 output, RDKit and openbabel [8] for cheminformatics handlings.

129 For each QSAR classification models, was used as independent data the matrix above defined  
130 ( $X_{DESCs}$  or  $X_{MFPs}$ ) with nohyperparameter optimization.

131 **Classification modeling.** Several binary classification models [9] were built with the following ML  
132 algorithms K-nearest neighbors (KNN) and logistic regression (LR), using as dependent variable  
133 vector the above defined datasets  $BA_{Class}$  and  $FA_{Class}$  datasets.

134 **Models’ performance internal evaluation.** To evaluate the QSAR models generalization ability in  
135 predicting biological profile of new chemical entities, K-Fold cross validations were run for BA and

136 FA datasets. In particular, the leave half out method (LHO) was used and repeated for 100  
137 iterations.

138 Finally, 1000 rounds of Y-scrambling were performed to assess any lack of chance correlation  
139 between.

140 **Virtual screening.** A database of about 1 million of compound was retrieved from a commercial  
141 vendor (VITAS-M) and subjected to the best QSAR models to rank the molecules and select the  
142 most promising as potential BCL2M (**Table S11**).

143 **Molecular docking.** All docking simulation were carried out with two free for academia programs,  
144 Smina and Plants considering all the possible combination of scoring function and minimization  
145 features (**Table S15**).

146 **Selection of experimental Bcl-2 complexed with venetoclax for docking assessment.** From a  
147 survey in the PDB database a list of four complexes (*wild* type and three mutated Bcl-2 proteins) of  
148 Bcl-2/venetoclax were found available (PDB entry codes: 6O0K, 6O0L, 6O0M\_2 and 6O0P, **Table**  
149 **S16**)

150 The Structures were loaded in UCSF Chimera and aligned by means of the matchmaker module  
151 (mmaker).

152 **Preparation of the selected proteins for the docking assessment.** The selected complexes subjected  
153 to a cleaning protocol similarly as described (8-11). The cleaned complexes were then added of  
154 hydrogen with the addh module and geometrically optimized with a short single point minimization  
155 with the embedded AMBER minimization core and the ff14SB force field with 1000 steepest  
156 descent steps and 100 of conjugate gradient steps. The parameters of the complexed ligands were  
157 calculated applying the embedded antechamber module using the generalized force field (GAFF),  
158 using Gasteiger charges. At the end of the minimization all the complexes were realigned and stored  
159 in PDB and MOL2 formats files. Each of all the minimized and aligned complexes were then  
160 separated into protein and ligand (venetoclax). PDBQT file were generated from MOL2 by means of  
161 command line tools available from AutoDock Tools 1.56 (ADT).

162 **Molecular docking settings.** Either Smina or Plants require to define the space to run the docking.  
163 To this, as all the complexes contained a well superimposed venetoclax conformation, the  
164 coordinate of just on venetoclax was used to define the docking space. To run the docking  
165 configuration files were prepared for either Smina (**Table S17**) and Plants (**Table S18**). For Plants  
166 the binding site center (bindingsite\_center 9.0 3.0 -7.0) it was defined by the reference.pdb center of  
167 mass, while the binding site radius (bindingsite\_radius 21.0) was calculated adding 5Å to the half of  
168 the longer dimension of the least box containing the reference.pdb file itself.

169 Docking affinities as calculated by the programs were stored and root mean square deviation  
170 (RMSD) were evaluated by means of the pkcombu program and used to calculate the docking  
171 accuracies.

172 IS20 and IS21 were docked into 6QGH (Bcl-2) and 4QNQ (Bcl-xL) proteins, and due to the lack of  
173 any complex of Mcl-1 with navitoclax the pdb entry code 6YBL was retrieved as co-crystallized  
174 with the a ligand structure closest to that of venetoclax. The latter was used to predict the IS20 and  
175 IS21 binding conformations into Mcl-1. Due to the high flexibility of the Bcl-2 family proteins  
176 three further complexes of Bcl-2, Bcl-xL and Mcl-1 complexed with BH3 were also retrieved  
177 (4B4S, 4QVF and 6QFI, respectively) to explore for alternative binding modes (**Tables S12** and  
178 **S13**).

179 **Structure preparation of interesting active compounds.** The structure of IS21, IS20, IS1, ISQ, ISP,  
180 IS9, IS27 and IS36 were available in SMILES format and then were converted into PDB and MOL2  
181 (for docking with Plants) formats files with openbabel 2.41 using the –gen3D option. Finally, the  
182 PDBQT (for docking with smina) formats were obtained by means of the ADT command line tools.

### 183 **Pharmacokinetic**

184 ***In vivo* experiments.** To evaluate the pharmacokinetic profile of IS20 and IS21, C57/Bl6 mice were  
185 intraperitoneally injected with a single dose of IS20 or IS21 (100 mg/kg) dissolved in 10% DMSO,  
186 30% PEG400 (Sigma-Aldrich) and 60% NaCl. Mice were sacrificed starting from 15 min to 24 h  
187 after injection. Blood samples were collected by cardiac puncture, centrifuged at 3,000 g for 10 min  
188 at 4 °C and the obtained plasma was stored at -80 °C until the analysis performed by liquid  
189 chromatography tandem mass spectrometry (LC–MS/MS). Given that the two compounds were  
190 singularly administered to the animals for the pharmacokinetic studies, IS20 was used as internal  
191 standard (IS) for IS21 and vice versa. Internal Standard Working Solutions (IS-WS) were prepared  
192 by adding appropriate volumes of the stock solutions to 50 mL of 0.1% formic acid (Fluka, Milan,  
193 Italy) in methanol:acetonitrile (50:50, v/v, Sigma-Aldrich), in order to reach a final concentration of  
194 50 ng/mL. The solutions were maintained at -20 °C.

195 ***LC-MS/MS Analysis.*** 40 µL of mouse plasma were mixed with 160 µL of IS-WS. The mixture was  
196 vortex mixed for 1 min and centrifuged at 12,000 g for 10 min at 4 °C. The supernatant was  
197 collected and 8 µL were injected into the LC–MS/MS system. The HPLC equipment consists of a  
198 Series 200 Micro-LC Pump and a Series 200 autosampler from Perkin Elmer (Norwalk, CT, USA).  
199 A triple quadrupole mass spectrometer, AB-Sciex API2000 (Toronto, ON, Canada) was used for  
200 detection. The analytes were analyzed using a C<sub>18</sub> phase Kinetex column (10 cm x 2.1 mm ID) from  
201 Phenomenex (Torrance, CA, USA) packed with core–shell particles of 2.6 µM. The mobile phases  
202 were (A) acetonitrile and (B) water, both containing 0.1% formic acid, at a flow rate of 0.25 mL/

203 min and were entirely transferred into the mass spectrometer source. Gradient elution was as  
204 follows: increase of the organic phase from 60 to 80% in 0.8 min, then to 90% in the following 1.2  
205 min and linearly to 100% in 2 min. Finally, after 3.9 min of 100%, the column was led to the  
206 original conditions in 2.5 min to enable equilibration of the column.

207 Both analytes were detected in positive ionization with a capillary voltage of 5500 V, nebulizer gas  
208 (air) at 40 psi, turbo gas (nitrogen) at 70 psi and 400 °C. The other ion source parameters were set  
209 as follows: curtain gas (CUR) 18 psi; collision gas (CAD) 6 psi; declustering potential (DP) 80 V,  
210 entrance potential (EP) 12 V.

211 The quantitative data were acquired using Multi Reaction Monitoring (MRM) acquisition mode.  
212 Two MRM transitions (precursor ion>fragment ion) were selected for the analytes. For IS20  
213 transitions were  $m/z$  692.3 > 407.3 and 692.3 > 161.1, collision energy (CE) was set at 30 and 52  
214 eV while collision cell exit potential (CXP) was at 19 and 8 V for the two transitions, respectively.  
215 For IS21 transitions were  $m/z$  706.3 > 421.3 and 706.3 > 160.7, collision energy (CE) was set at 30  
216 and 51 eV while collision cell exit potential (CXP) was at 21 and 6 V for the two transitions,  
217 respectively.

218 The analytical method was validated according to FDA guidelines for bioanalytical method  
219 validation. Linearity, recovery, matrix effect, precision, accuracy, limits of detection (LODs) and  
220 lower limits of quantification (LLOQs) were evaluated.

221 Calibration standard solutions were prepared in blank plasma by spiking 25  $\mu$ L of a standard  
222 mixture at appropriate concentration to 40  $\mu$ L of plasma and by adding 140  $\mu$ L of methanol:  
223 acetonitrile (50:50, v/v). Calibrators were then treated similarly to the animal samples. The  
224 calibration range was 5 to 7500 ng/mL and the calibrators were prepared at nine level of  
225 concentration. Precision, recovery and accuracy were evaluated at three level of concentrations (25,  
226 25, 5000 ng/mL) and resulted within the acceptable limits.

227 The limit of detection (LOD) was defined as the lowest concentration with a signal-to-noise (S/N)  
228 ratio greater than 3. The limit of quantification (LOQ) was defined as the concentration at which  
229 both precision (RSD%) and accuracy were less than 20%. LOQ resulted to be 2 ng/mL while LOD  
230 was 0.5 ng/mL.

231 The validated method was then successfully applied in measuring IS20 and IS21 following drug  
232 administration in mice plasma to support the pharmacokinetic study (**Figure S8A,B**).

233

234

235

236

**SUPPLEMENTARY TABLES**

**Table S1.** Accuracy (ACC) and Matthews correlation coefficient (MCC) for the ML models developed with  $FA_{Class}$  dataset and DESCs.

| ML method            | Fitting |      | Cross-Validation |      |
|----------------------|---------|------|------------------|------|
|                      | ACC     | MCC  | ACC              | MCC  |
| RandomForest         | 0.99    | 0.97 | 0.83             | 0.62 |
| GradientBoosting     | 0.99    | 0.97 | 0.87             | 0.71 |
| SVM_linearL1         | 0.79    | 0.55 | 0.73             | 0.41 |
| SVM_linearL2         | 0.79    | 0.54 | 0.77             | 0.51 |
| LogisticRegressionL1 | 0.87    | 0.71 | 0.81             | 0.59 |
| LogisticRegressionL2 | 0.91    | 0.80 | 0.79             | 0.53 |
| KNeighbors           | 0.88    | 0.74 | 0.81             | 0.60 |

**Table S2.** Accuracy (ACC) and Matthews correlation coefficient (MCC) for the ML models developed with  $FA_{Class}$  dataset and FPs.

| ML method            | Fitting |      | Cross-Validation |      |
|----------------------|---------|------|------------------|------|
|                      | ACC     | MCC  | ACC              | MCC  |
| RandomForest         | 1.00    | 1.00 | 0.83             | 0.62 |
| GradientBoosting     | 1.00    | 1.00 | 0.83             | 0.62 |
| SVM_linearL1         | 0.88    | 0.74 | 0.79             | 0.53 |
| SVM_linearL2         | 0.95    | 0.89 | 0.83             | 0.62 |
| LogisticRegressionL1 | 0.96    | 0.92 | 0.83             | 0.62 |
| LogisticRegressionL2 | 1.00    | 1.00 | 0.83             | 0.62 |
| KNeighbors           | 0.91    | 0.80 | 0.84             | 0.65 |

237

**Table S3.** Accuracy (ACC) and Matthews correlation coefficient (MCC) for the ML models developed with  $FA_{Class}$  dataset and Hybrid (see text).

| ML method            | Fitting |      | Cross-Validation |      |
|----------------------|---------|------|------------------|------|
|                      | ACC     | MCC  | ACC              | MCC  |
| RandomForest         | 1.00    | 1.00 | 0.85             | 0.68 |
| GradientBoosting     | 1.00    | 1.00 | 0.85             | 0.68 |
| SVM_linearL1         | 0.84    | 0.67 | 0.77             | 0.50 |
| SVM_linearL2         | 0.97    | 0.94 | 0.81             | 0.59 |
| LogisticRegressionL1 | 0.96    | 0.92 | 0.80             | 0.56 |
| LogisticRegressionL2 | 1.00    | 1.00 | 0.83             | 0.62 |
| KNeighbors           | 0.91    | 0.80 | 0.80             | 0.56 |

238

**Table S4.** Accuracy (ACC) and Matthews correlation coefficient (MCC) for the ML models developed with  $BA_{Class}$  dataset and DESCs.

| ML method | Fitting |     | Cross-Validation |     |
|-----------|---------|-----|------------------|-----|
|           | ACC     | MCC | ACC              | MCC |



|                      |      |      |      |      |
|----------------------|------|------|------|------|
| RandomForest         | 0.96 | 0.92 | 1.00 | 1.00 |
| GradientBoosting     | 0.96 | 0.91 | 0.98 | 0.95 |
| SVM_linearL1         | 0.95 | 0.90 | 0.96 | 0.92 |
| SVM_linearL2         | 0.95 | 0.89 | 0.96 | 0.91 |
| LogisticRegressionL1 | 0.95 | 0.89 | 0.96 | 0.91 |
| LogisticRegressionL2 | 0.95 | 0.89 | 0.96 | 0.91 |
| KNeighbors           | 0.95 | 0.91 | 0.97 | 0.93 |

**Table S5.** Accuracy (ACC) and Matthews correlation coefficient (MCC) for the ML models developed with  $BA_{Class}$  dataset and FPs.

| ML method            | Fitting |      | Cross-Validation |      |
|----------------------|---------|------|------------------|------|
|                      | ACC     | MCC  | ACC              | MCC  |
| RandomForest         | 1.00    | 1.00 | 0.96             | 0.91 |
| GradientBoosting     | 0.97    | 0.93 | 0.95             | 0.90 |
| SVM_linearL1         | 0.98    | 0.96 | 0.95             | 0.91 |
| SVM_linearL2         | 0.98    | 0.96 | 0.95             | 0.91 |
| LogisticRegressionL1 | 0.99    | 0.98 | 0.95             | 0.91 |
| LogisticRegressionL2 | 1.00    | 1.00 | 0.96             | 0.92 |
| KNeighbors           | 0.97    | 0.93 | 0.95             | 0.89 |

**Table S6.** Accuracy (ACC) and Matthews correlation coefficient (MCC) for the ML models developed with  $BA_{Class}$  dataset and FPs.

| ML method            | Fitting |      | Cross-Validation |      |
|----------------------|---------|------|------------------|------|
|                      | ACC     | MCC  | ACC              | MCC  |
| RandomForest         | 1.00    | 1.00 | 0.96             | 0.92 |
| GradientBoosting     | 0.97    | 0.95 | 0.96             | 0.91 |
| SVM_linearL1         | 0.98    | 0.96 | 0.95             | 0.90 |
| SVM_linearL2         | 0.99    | 0.97 | 0.95             | 0.91 |
| LogisticRegressionL1 | 0.99    | 0.98 | 0.96             | 0.91 |
| LogisticRegressionL2 | 1.00    | 1.00 | 0.96             | 0.91 |
| KNeighbors           | 0.97    | 0.93 | 0.95             | 0.89 |

**Table S7.** Accuracy (ACC) and Matthews correlation coefficient (MCC) for the ML models developed with the soft voting classifier.

| Model combination               | Fitting |      | Cross-Validation |      |
|---------------------------------|---------|------|------------------|------|
|                                 | ACC     | MCC  | ACC              | MCC  |
| $FA_{Class}$ dataset and DESCs  | 0.97    | 0.94 | 0.83             | 0.62 |
| $FA_{Class}$ dataset and FPs    | 1.00    | 1.00 | 0.81             | 0.60 |
| $FA_{Class}$ dataset and Hybrid | 1.00    | 1.00 | 0.84             | 0.65 |
| $BA_{Class}$ dataset and DESCs  | 0.97    | 0.95 | 0.96             | 0.89 |
| $BA_{Class}$ dataset and FPs    | 0.99    | 0.96 | 0.96             | 0.90 |
| $BA_{Class}$ dataset and Hybrid | 0.99    | 0.98 | 0.96             | 0.91 |

241

242 **Table S8.** List of 49 screened compounds. In bold are reported the 8 most effective compounds.

243 \*Two most characterized compounds (IS20 and IS21).

| ARBITRARY CODE | VITAS-M ID       | ARBITRARY CODE | VITAS-M ID       |
|----------------|------------------|----------------|------------------|
| <b>IS1</b>     | <b>STK066520</b> | <b>IS29</b>    | <b>STL341576</b> |
| IS3            | STK893094        | IS30           | STK541283        |
| IS5            | STK145249        | IS31           | STK549022        |
| IS6            | STK398814        | IS32           | STL049462        |
| IS7            | STL168349        | IS33           | STL052557        |
| IS8            | STL168606        | IS34           | STK550725        |
| <b>IS9</b>     | <b>STL481050</b> | IS35           | STK145055        |
| IS10           | STL481045        | IS37           | STL429533        |
| IS11           | STK060635        | ISA            | STK366292        |
| IS13           | STK595018        | ISB            | STK367596        |
| IS14           | STK548699        | ISC            | STK394848        |
| IS15           | STK673714        | ISD            | STK362856        |
| IS16           | STL057856        | ISE            | STK146847        |
| IS17           | STL052719        | ISF            | STL132867        |
| IS18           | STK551574        | ISG            | STK194419        |
| IS19           | STK554551        | ISH            | STK192532        |
| <b>IS20 *</b>  | <b>STK569102</b> | ISI            | STK389854        |
| <b>IS21 *</b>  | <b>STK570207</b> | ISL            | STK332010        |
| IS23           | STK584185        | ISO            | STL380528        |
| IS24           | STK593354        | <b>ISP</b>     | <b>STL181070</b> |
| IS25           | STK597501        | <b>ISQ</b>     | <b>STL173124</b> |
| IS26           | STK792977        | ISR            | STK117446        |
| <b>IS27</b>    | <b>STL333693</b> | ISS            | STK115790        |
| IS28           | STL337517        | IST            | STK237001        |
|                |                  | ISU            | STK237006        |

244

245

**Table S9.** Predicted docked energy by the VINA scoring function for IS21 as docked into Bcl-2, Bcl-xL and Mcl-1 proteins extracted from complexes containing small molecule ligands (pdb entry codes: 6QGH, 4QNQ and 6YBL) and from complexes containing the BIM BH3  $\alpha$ -helix (pdb entry codes: 4BAS, 4QVF and 6QFI).

| Bcl Protein Type | pdb entry code | Docking Energy (kcal/mol) |       | KD <sub>1</sub> ( $\mu$ M) |      |
|------------------|----------------|---------------------------|-------|----------------------------|------|
|                  |                | IS21                      | IS20  | IS21                       | IS20 |
| Bcl-2            | 6QGH           | -8.64                     | -8.29 |                            |      |
|                  | 4B4S           | -7.86                     | -7.40 | 0.32                       | 0.19 |
|                  | Average        | -8.25                     | -7.85 |                            |      |
| Bcl-xL           | 4QNQ           | -8.67                     | -8.25 |                            |      |
|                  | 4QVF           | -8.26                     | -8.16 | 0.42                       | 0.51 |
|                  | Average        | -8.46                     | -8.21 |                            |      |
| Mcl-1            | 6YBL           | -7.65                     | -7.53 |                            |      |
|                  | 6QFI           | -8.09                     | -6.93 | 3.90                       | 1.16 |
|                  | Average        | -7.87                     | -7.23 |                            |      |

246

247 **Table S10.** ADMET parameter as calculated by mean of the swissadme web tool [13].

| Molecule                      | IS20           | IS21           | venetoclax     |
|-------------------------------|----------------|----------------|----------------|
| MW                            | 692.24         | 706.27         | 868.44         |
| #Heavy atoms                  | 47             | 48             | 61             |
| #Aromatic heavy atoms         | 23             | 23             | 27             |
| Fraction Csp3                 | 0.31           | 0.33           | 0.38           |
| #Rotatable bonds              | 12             | 13             | 14             |
| #H-bond acceptors             | 8              | 8              | 9              |
| #H-bond donors                | 1              | 1              | 3              |
| MR                            | 188.2          | 193.01         | 246.7          |
| TPSA                          | 164.62         | 164.62         | 183.09         |
| MLOGP                         | 3.1            | 3.69           | 3.22           |
| ESOL Log S                    | -8.9           | -9.26          | -9.78          |
| ESOL Solubility (mg/ml)       | 0.000000872    | 0.000000389    | 0.000000144    |
| ESOL Solubility (mol/l)       | 1.26E-09       | 5.5E-10        | 1.65E-10       |
| ESOL Class                    | Poorly soluble | Poorly soluble | Poorly soluble |
| Silicos-IT Solubility (mol/l) | 1.14E-11       | 4.72E-12       | 4.45E-14       |
| Silicos-IT class              | Insoluble      | Insoluble      | Insoluble      |
| GI absorption                 | Low            | Low            | Low            |
| BBB permeant                  | No             | No             | No             |
| Pgp substrate                 | Yes            | Yes            | Yes            |
| CYP1A2 inhibitor              | No             | No             | No             |
| CYP2C19 inhibitor             | Yes            | Yes            | No             |
| CYP2C9 inhibitor              | No             | No             | No             |
| CYP2D6 inhibitor              | No             | Yes            | No             |
| CYP3A4 inhibitor              | No             | No             | No             |
| log Kp (cm/s)                 | -4.67          | -4.36          | -5.79          |
| Lipinski #violations          | 1              | 1              | 2              |
| Synthetic Accessibility       | 5.77           | 5.89           | 6.05           |

248

249 **Table S11.** Root mean squared deviations (RMSD) in the re-docking assessment of venetoclax in  
 250 four experimental complexes (wild type and three mutated Bcl-2 proteins). The mean values are  
 251 also reported.

| PDB ID | Smina |                      |         |                   | Plants      |                   |      |       |         |
|--------|-------|----------------------|---------|-------------------|-------------|-------------------|------|-------|---------|
|        | VINA  |                      | VINARDO |                   | AD4_SCORING |                   | PLP  | PLP95 | CHEMPLP |
|        | BD*   | BD <sub>Min</sub> ** | BD      | BD <sub>Min</sub> | BD          | BD <sub>Min</sub> |      |       |         |
| 6O0K   | 1.33  | 1.31                 | 1.32    | 1.32              | 1.32        | 1.31              | 1.69 | 1.59  | 6.78    |
| 6O0L   | 1.61  | 1.62                 | 1.65    | 1.63              | 1.65        | 1.66              | 1.59 | 1.79  | 1.70    |
| 6O0M   | 1.15  | 1.16                 | 1.20    | 1.24              | 1.16        | 1.74              | 2.34 | 2.08  | 2.16    |
| 6O0P   | 1.25  | 1.25                 | 1.24    | 1.25              | 1.26        | 1.10              | 0.63 | 1.25  | 5.57    |
| Mean   | 1.34  | 1.34                 | 1.35    | 1.36              | 1.35        | 1.45              | 1.56 | 1.68  | 4.05    |

\*BD: Best Docked conformation; \*\*BD<sub>Min</sub>: minimized BD; VINA, VINARDO, AD4\_SCORING are the scoring function available in smina; PLP, PLP95 and CHEMPLP are the scoring function available in Plants.

252

253 **Table S12.** Re-docking assessment for the Smina molecular docking program for the navitoclax  
 254 Bcl-2 and Bcl-xL complexes. Root mean squared deviations (RMSD) and their mean values are also  
 255 reported.

| scoring     | pdb entry code   |         | ECRD | ECRD Min | RCRD | RCRD Min |
|-------------|------------------|---------|------|----------|------|----------|
|             | Ligand           | Protein |      |          |      |          |
| AD4_SCORING | 6QGH             | 6QGH    | 2.21 | 1.39     | 3.09 | 3.38     |
|             | 4QNQ             | 4QNQ    | 5.04 | 5.19     | 3.37 | 3.46     |
|             | Average          |         | 3.62 | 3.29     | 3.23 | 3.42     |
|             | Docking Accuracy |         | 25   | 50       | 25   | 25       |
| VINA        | 6QGH             | 6QGH    | 2.31 | 1.34     | 2.55 | 4.00     |
|             | 4QNQ             | 4QNQ    | 1.94 | 1.59     | 1.35 | 3.95     |
|             | Average          |         | 2.12 | 1.46     | 1.95 | 3.97     |
|             | Docking Accuracy |         | 75   | 100      | 75   | 25       |
| VINARDO     | 6QGH             | 6QGH    | 2.24 | 1.15     | 5.36 | 5.68     |
|             | 4QNQ             | 4QNQ    | 1.41 | 1.41     | 1.16 | 5.18     |
|             | Average          |         | 1.82 | 1.28     | 3.26 | 5.43     |
|             | Docking Accuracy |         | 75   | 100      | 50   | 0        |

ECRD: experimental conformation re-docking; ECRD: experimental conformation re-docking after minimization; RCRD: random conformation re-docking; docking; RCRD: random conformation re-dockin after minimization; VINA, VINARDO, AD4\_SCORING are the scoring function available in smina; pdb entry code: PDB codes for Bcl-2 and Bcl-xL proteins co-crystallized with navitoclax

256 **Table S13.** Cross-docking assessment for the Smina molecular docking program for the navitoclax  
 257 Bcl-2 and Bcl-xL complexes. Root mean squared deviations (RMSD) and their mean values are also  
 258 reported

| scoring     | pdb entry code   |         | ECRD | ECRD Min | RCRD | RCRD Min |
|-------------|------------------|---------|------|----------|------|----------|
|             | Ligand           | Protein |      |          |      |          |
| AD4_SCORING | 6QGH             | 4QNQ    | 4.11 | 4.54     | 3.83 | 5.51     |
|             | 4QNQ             | 6QGH    | 2.37 | 2.37     | 2.80 | 3.49     |
|             | Average          |         | 3.24 | 3.45     | 3.31 | 4.50     |
|             | Docking Accuracy |         | 25   | 25       | 37.5 | 12.5     |
| VINA        | 6QGH             | 4QNQ    | 1.53 | 1.53     | 1.71 | 3.83     |
|             | 4QNQ             | 6QGH    | 2.31 | 1.67     | 4.69 | 3.22     |
|             | Average          |         | 1.92 | 1.60     | 3.20 | 3.52     |
|             | Docking Accuracy |         | 75   | 100      | 50   | 25       |
| VINARDO     | 6QGH             | 4QNQ    | 1.41 | 1.88     | 1.56 | 3.95     |
|             | 4QNQ             | 6QGH    | 1.46 | 2.60     | 4.15 | 3.65     |
|             | Average          |         | 1.43 | 2.24     | 2.85 | 3.80     |
|             | Docking Accuracy |         | 100  | 75       | 50   | 25       |

ECCD: experimental conformation cross-docking; ECRD: experimental conformation cross-docking after minimization; RCCD: random conformation cross-docking; docking; RCCD: random conformation cross-docking after minimization; VINA, VINARDO, AD4\_SCORING are the scoring function available in smina; pdb entry code: PDB codes for Bcl-2 and Bcl-xL proteins co-crystallized with navitoclax

259

**Table S14.** Docking energies (kcal/mol) for IS21, IS20, IS1, ISQ, ISP, IS9, IS27 and IS36 into wild type and three mutated Bcl-2 proteins. As comparison the SPR experimental  $KD_1$  are also displayed.

| Cmpd | $KD_1^*$ | Docking energies (kcal/mol) into PDB IDs (BCL-2) |              |              |             |
|------|----------|--------------------------------------------------|--------------|--------------|-------------|
|      |          | 6O0K (WT)                                        | 6O0L (G101V) | 6O0M (F104L) | 6O0P(G101A) |
| IS21 | 0.19     | -8.7                                             | -8.9         | -9.0         | -8.7        |
| IS20 | 0.32     | -8.3                                             | -7.2         | -8.2         | -8.3        |
| IS1  | 0.48     | -8.5                                             | -7.5         | -7.7         | -8.4        |
| ISQ  | 0.53     | -8.5                                             | -8.6         | -8.6         | -8.8        |
| ISP  | 0.77     | -8.3                                             | -8.1         | -8.6         | -8.3        |
| IS29 | 3.40     | -8.1                                             | -7.9         | -8.2         | -8.3        |
| IS9  | 4.00     | -7.4                                             | -6.7         | -7.0         | -6.8        |
| IS27 | 4.60     | -7.9                                             | -7.7         | -8.4         | -7.6        |

260

261

262 **Table S15.** List of used combinations for the docking experiments.

| # | Docking Combination   | Software | Scoring Function | Minimization feature |
|---|-----------------------|----------|------------------|----------------------|
| 1 | Smina/AD4_SCORING/Raw | Smina    | Autodock 4       | no                   |
| 2 | Smina/AD4_SCORING/Min | Smina    | Autodock 4       | yes                  |
| 3 | Smina/VINA/Raw        | Smina    | Vina             | no                   |
| 4 | Smina/VINA/Raw        | Smina    | Vina             | yes                  |
| 5 | Smina/VINARDO/Raw     | Smina    | Vinardo          | no                   |
| 6 | Smina/VINARDO/Raw     | Smina    | Vinardo          | yes                  |
| 7 | Plants/PLP            | Plants   | PLP              | -                    |
| 8 | Plants/PLP95          | Plants   | PLP95            | -                    |
| 9 | Plants/CHEMPLP        | Plants   | ChemPLP          | -                    |

**Table S16.** PDB codes for the co-crystallized venetoclax/Bcl-2 complexes.

| PDB entry code | Mutation  | Reference |
|----------------|-----------|-----------|
| 6O0K           | Wild Type | [12]      |
| 6O0L           | G101V     | [12]      |
| 6O0M           | F104L     | [12]      |
| 6O0P           | G101A     | [12]      |

263

**Table S17.** Setting for Smina.

```
autobox_ligand = reference.pdb
autobox_add = 5
cpu = 12
exhaustiveness = 32
min_rmsd_filter = 2
num_modes = 100
```

For the minimization feature the minimize\_iters = 1000 key was used

264

**Table S18.** Setting for Plants (example for chemplp scoring function).

```
# scoring function and search settings
aco_ants 20
scoring_functionchemplp
outside_binding_site_penalty 50.0
enable_sulphur_acceptors 0
ligand_intra_score clash2
search_speed speed1
outside_binding_site_penalty 50.0
flip_amide_bonds 1
flip_planar_n 1
force_flipped_bonds_planarity 0
force_planar_bond_rotation 1
rescore_mode simplex
flip_ring_corners 0
chemplp_clash_include_14 1
chemplp_clash_include_HH 0
```

---

```
plp_steric_e -0.4
plp_burpolar_e -0.05
plp_hbond_e -2.0
plp_metal_e -4.0
plp_repulsive_weight 0.5
plp_tors_weight 1.0
chemplp_weak_cho 1
chemplp_charged_hb_weight 2.0
chemplp_charged_metal_weight 2.0
chemplp_hbond_weight -3.0
chemplp_hbond_cho_weight -3.0
chemplp_metal_weight -6.0
chemplp_plp_weight 1.0
chemplp_plp_steric_e -0.4
chemplp_plp_burpolar_e -0.1
chemplp_plp_hbond_e -0.1
chemplp_plp_metal_e -1.0
chemplp_plp_repulsive_weight 1.0
chemplp_tors_weight 2.0
chemplp_lipo_weight 0.0
chemplp_intercept_weight -20.0
# binding site definition
bindingsite_center 9.0 3.0 -7.0
bindingsite_radius 21.0
# output
write_protein_conformations 0
write_protein_bindingsite 0
write_protein_splitted 0
write_rescored_structures 1
write_multi_mol2 1
write_ranking_links 1
write_ranking_multi_mol2 0
write_per_atom_scores 1
write_merged_ligand 0
write_merged_protein 0
write_merged_water 0
keep_original_mol2_description 1
merge_multi_conf_output 1
merge_multi_conf_character .
# write single mol2 files (e.g. for RMSD calculation)
write_multi_mol2 0
write_ranking_links 1
# cluster algorithm
cluster_structures 100
cluster_rmsd 2.0
```

---

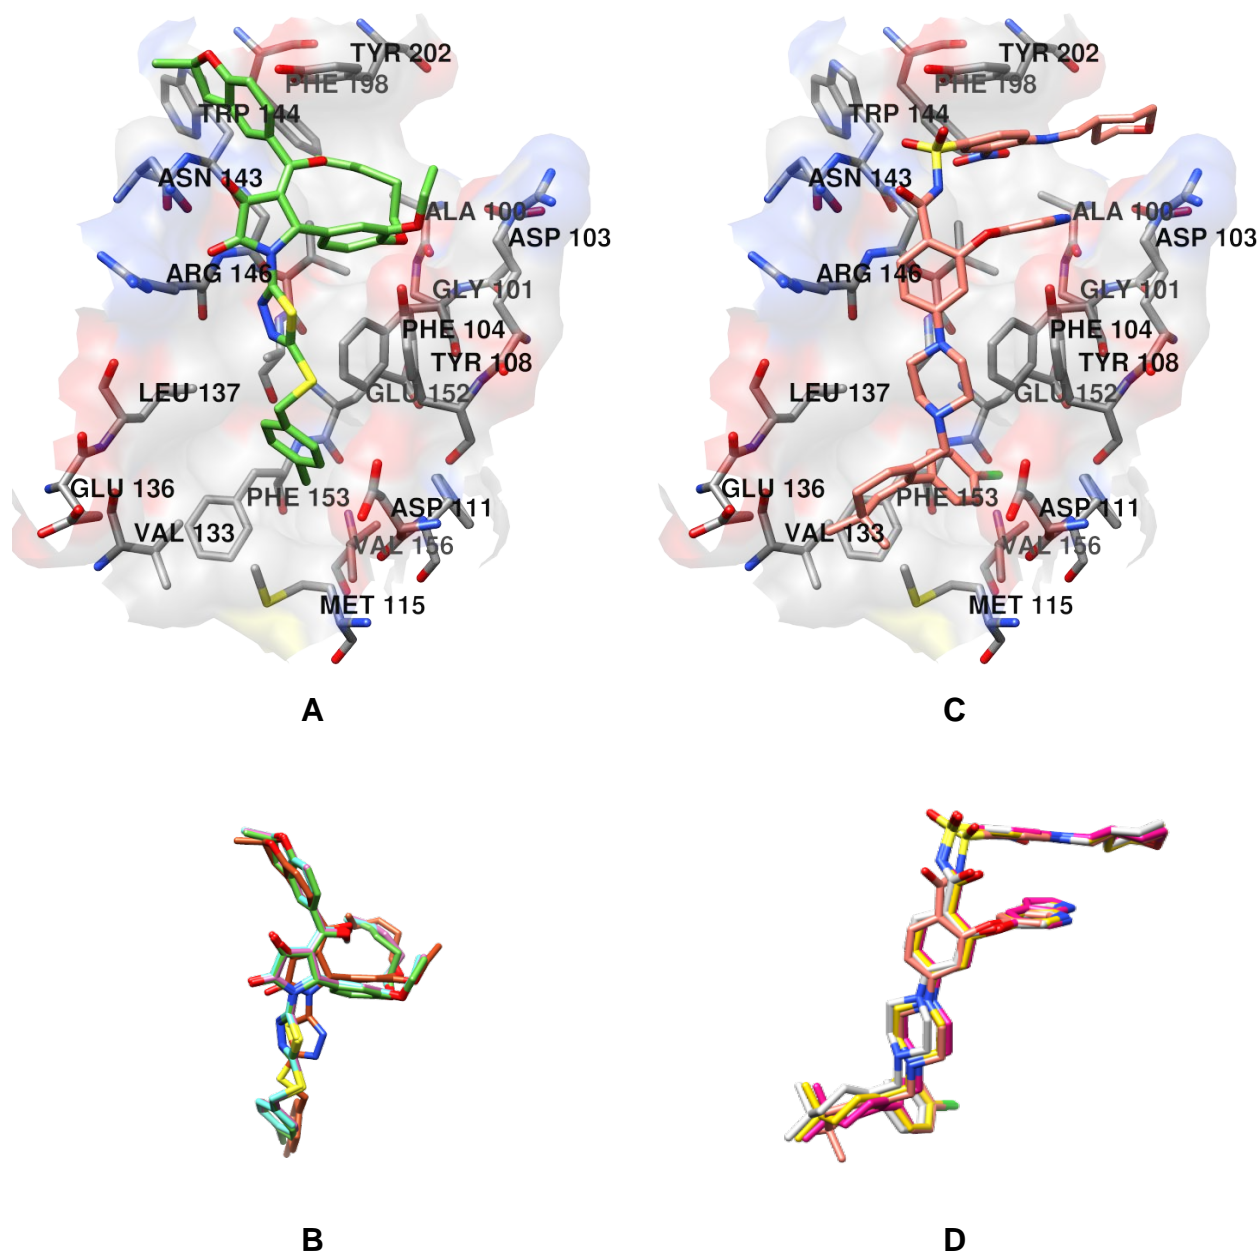

**Figure S1.** (A) Docked conformation of IS21 into the wild type Bcl-2. (B) structure-based superimposed IS21 docked conformation in the *wild* type and three mutated Bcl-2 proteins. (C) Venetoclax experimental bound conformation as in the wild type Bcl-2 (pdb id 6O0K). (D) structure-based overlapped experimental bound conformations of venetoclax as in *wild* type and three mutated Bcl-2 proteins (pdb ids: 6O0K (WT), 6O0L (G101V), 6O0M (F104L) and 6O0P(G101A)).



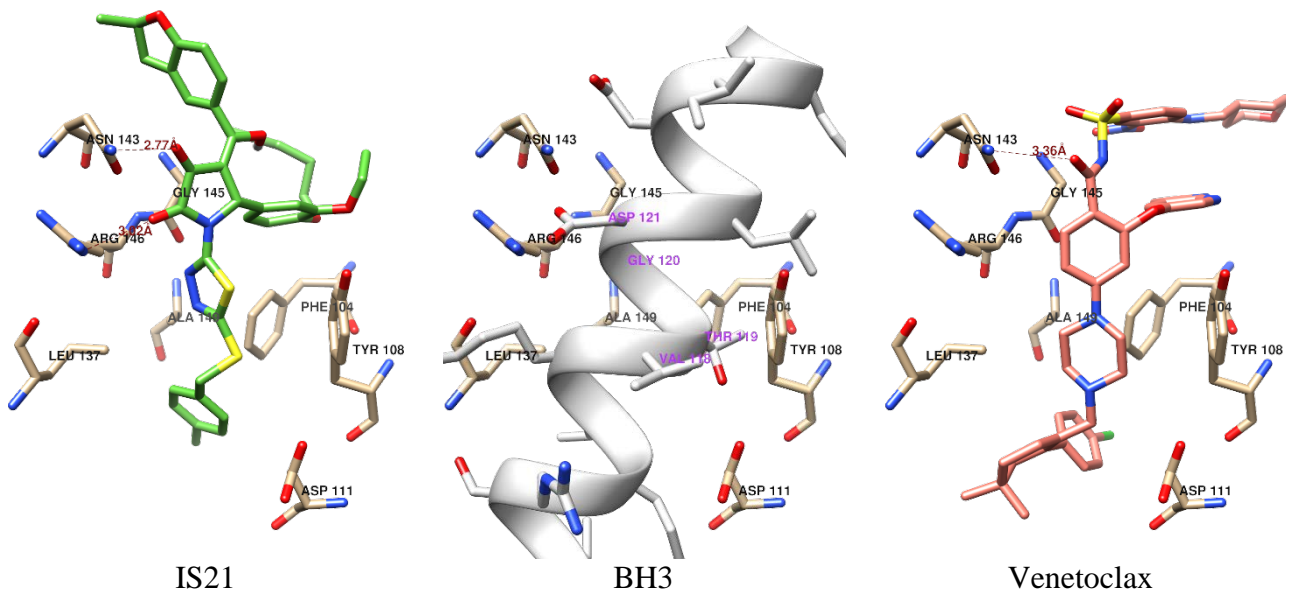

**Figure S2.** Docked conformation of IS21 (green colored carbon atoms) into wild type Bcl-2 compared to experimental venetoclax bound conformation (orange colored carbon atoms) BH3  $\alpha$ -helix (light gray colored ribbon and carbon atoms) is also show as extracted from 5VAX pdb entry.

268

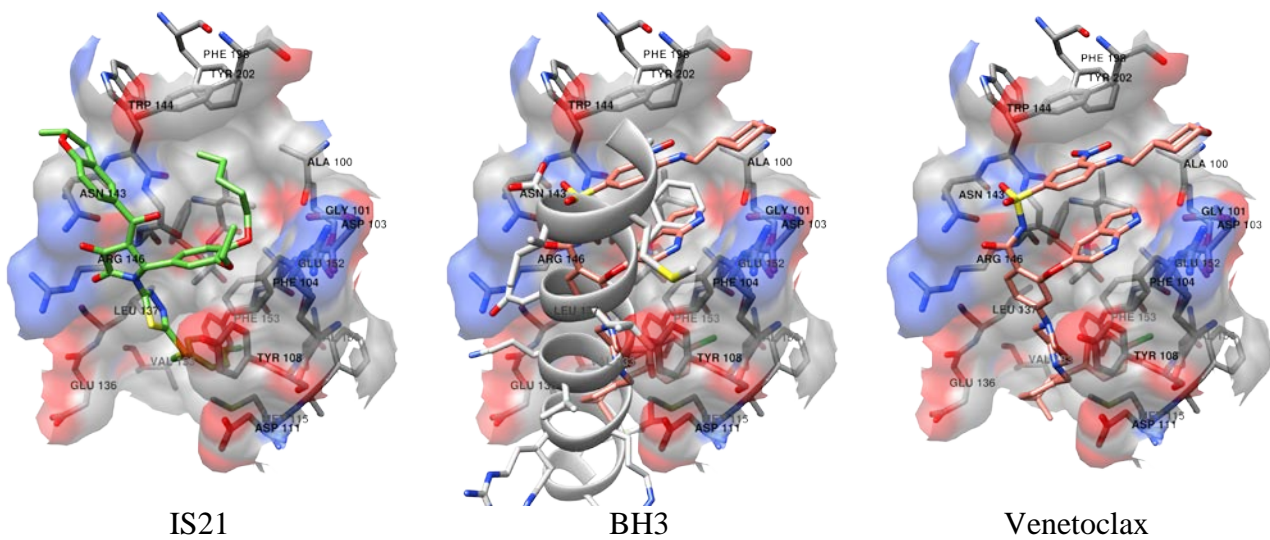

**Figure S3.** Docked conformation of IS21 (green colored carbon atoms) into wild type Bcl-2 compared to experimental venetoclax bound conformation (orange colored carbon atoms and golden surface) as found in the 6O0k pdb entry. BH3  $\alpha$ -helix (light gray colored ribbon and carbon atoms) is also show as extracted from 5VAX pdb entry. The Bcl-2 is also showed as colored by atom type.

269

270

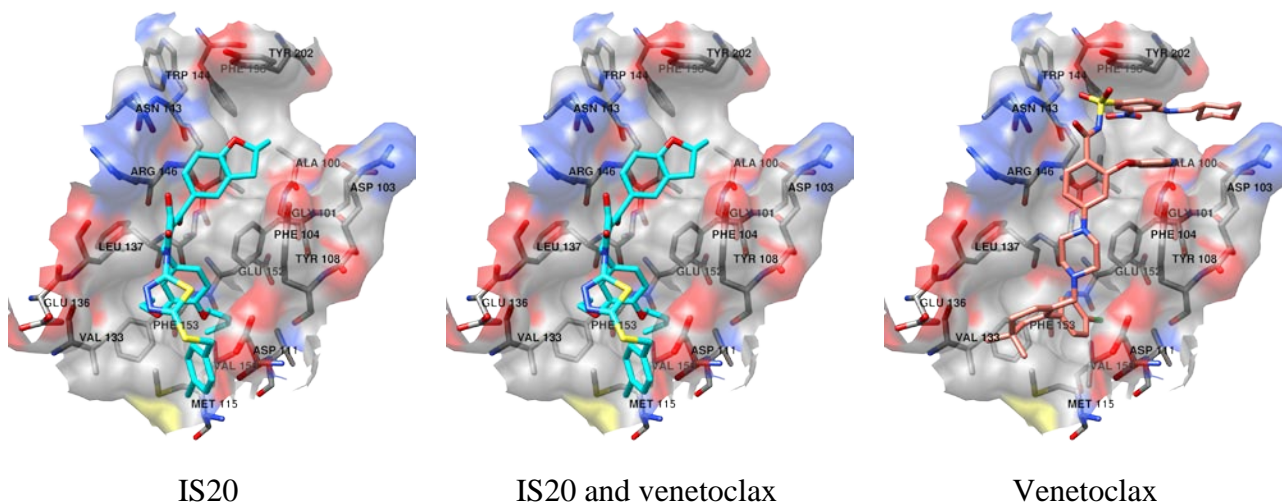

**Figure S4.** Docked conformation of IS20 (cyan colored carbon atoms) into wild type Bcl-2 compared with the experimental bound conformation of venetoclax (orange colored carbon atoms) as found in the 6O0k pdb entry. The Bcl-2 is also showed as colored by atom type

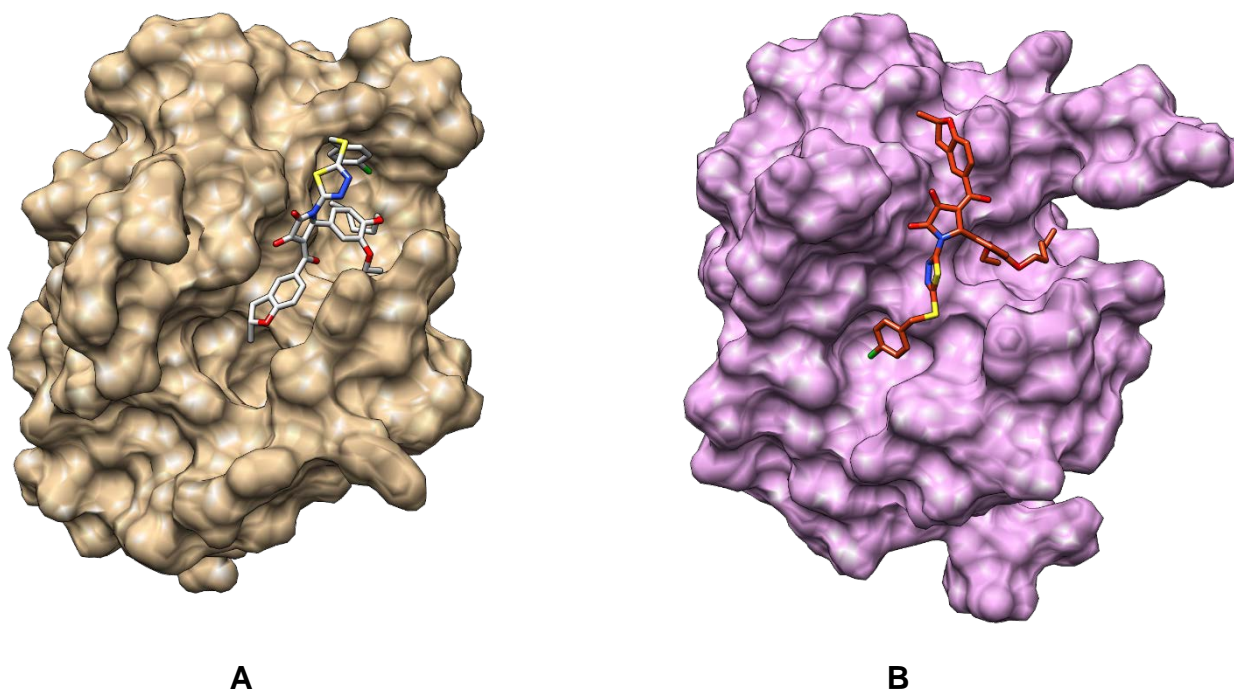

**Figure S5.** (A) IS21 docked conformation into Bcl-2 protein extracted from 6QGH. (B) IS21 docked conformation into Bcl-2 protein extracted from 4BAS.

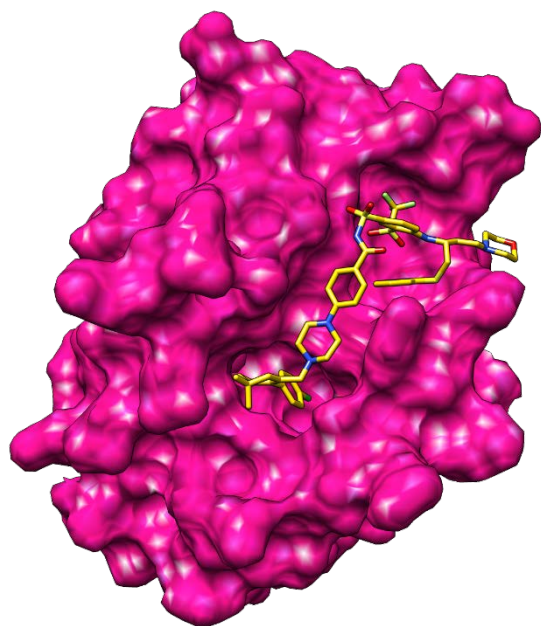

**A**

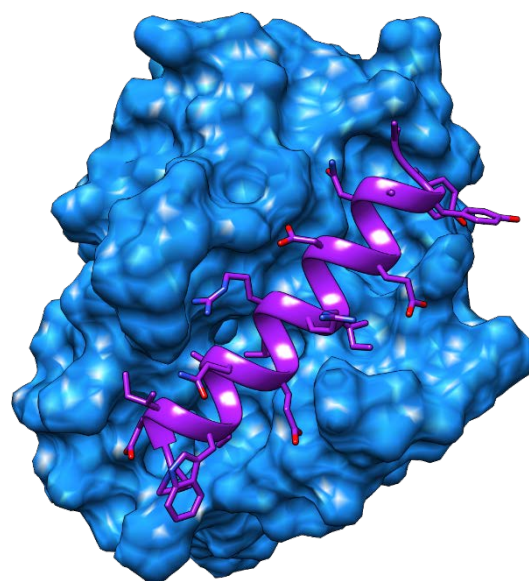

**B**

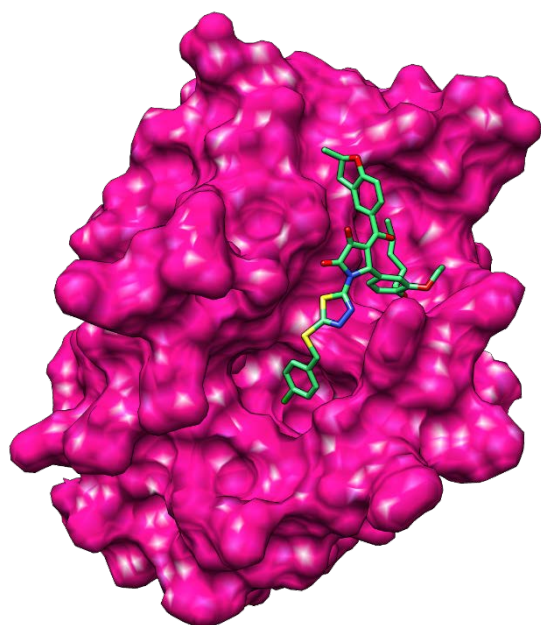

**C**

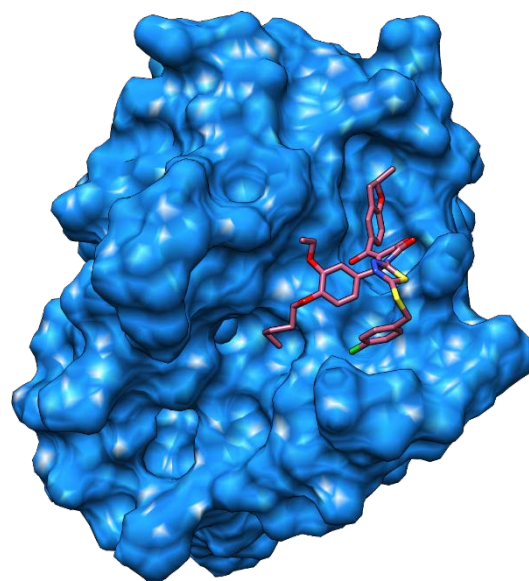

**D**

**Figure S6.** (A) Bcl-xL protein complexed with Navitoclax (pdb id 4QNQ). (B): Bcl-xL protein complexed with BIN BH3 (pdb id 4QVF). (C) IS21 docked conformation into Bcl-xL protein extracted from 4QNQ. (D) IS21 docked conformation into Bcl-xL protein extracted from 4QVF.

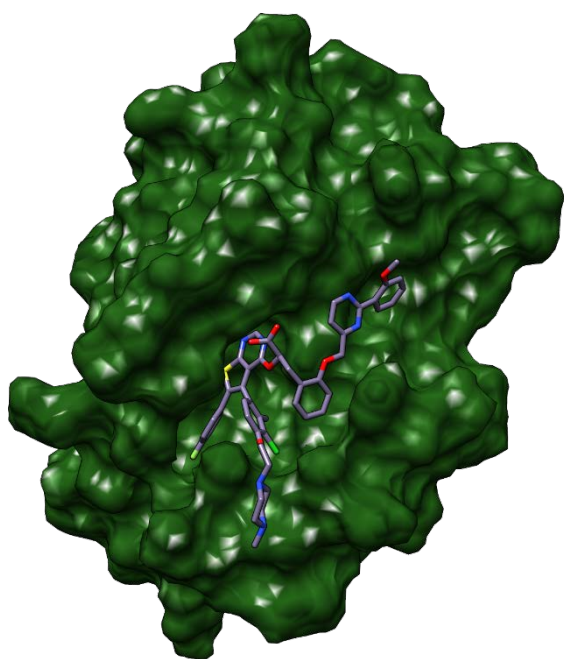

**A**

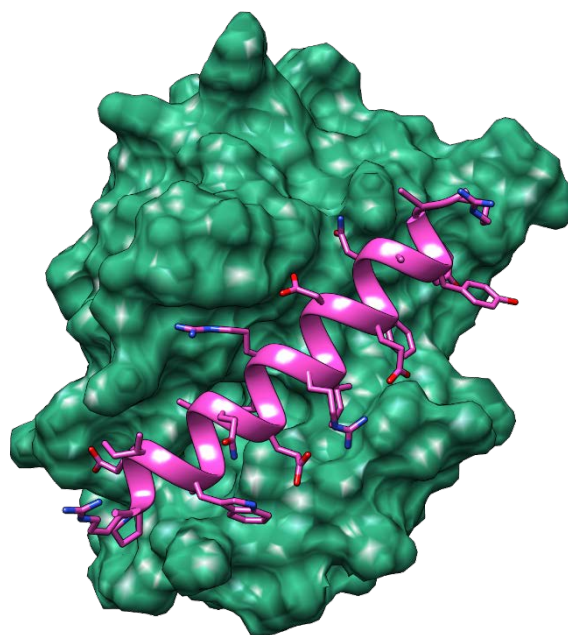

**B**

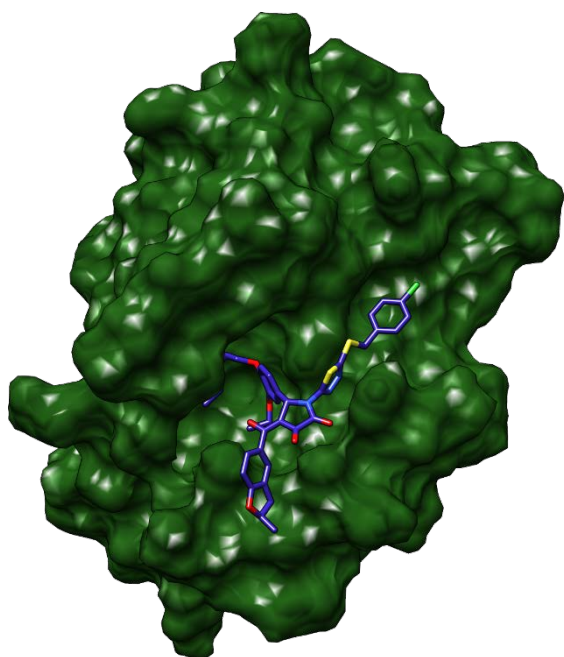

**C**

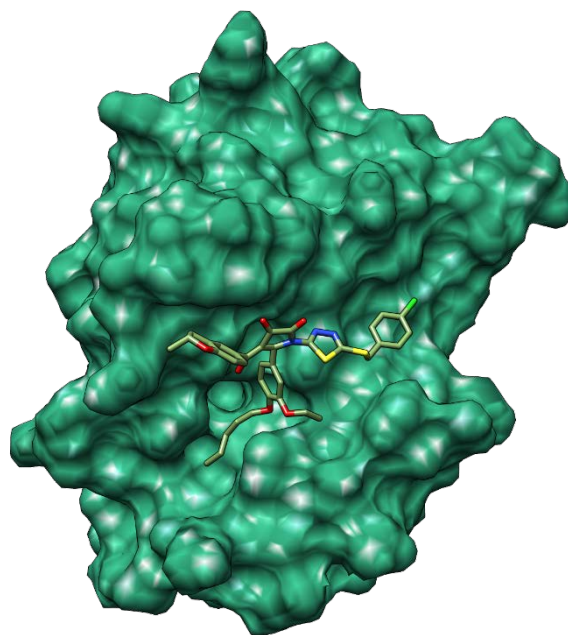

**D**

**Figure S7.** (A) Mcl-1 protein complexed with Navitoclax (pdb id 6YBL). (B) Mcl-1 protein complexed with BIN BH3 (pdb id 6QFI). (C) IS21 docked conformation into Bcl-2 protein extracted from 6YBL. (D) IS21 docked conformation into Mcl-1 protein extracted from 6QFI.

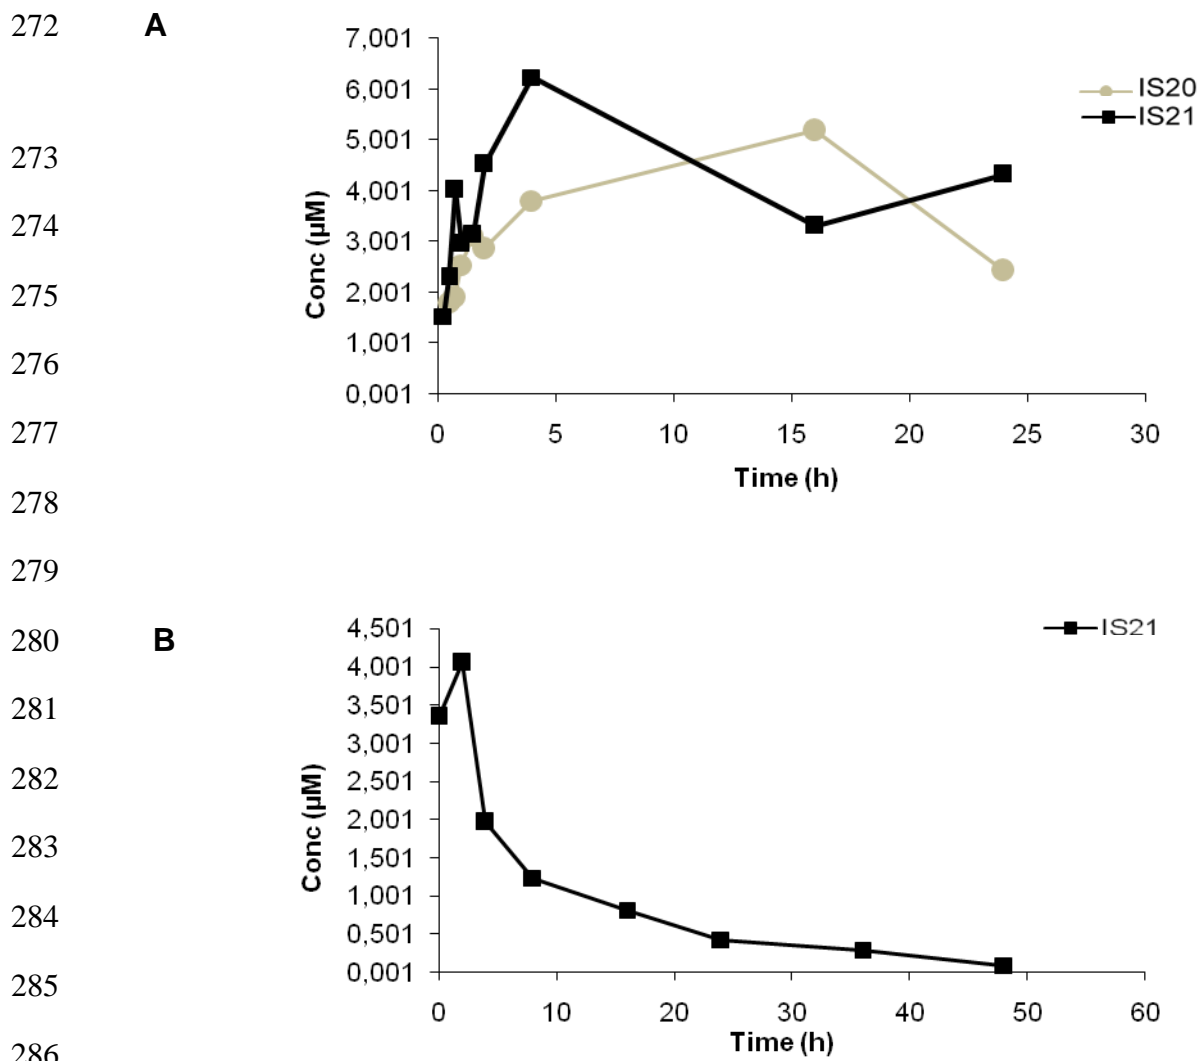

287 **Figure S8.** (A) Biopharmaceutical profile of IS20 (grey line) and IS21 (black line). Graph showing  
 288 the more rapid adsorption of IS21 respect to IS20 in mice plasma following drug administration at  
 289 100 mg/kg. (B) Biopharmaceutical profile of IS21. Graph showing the measure of IS21 in mice  
 290 plasma following drug administration at 50 mg/kg. (A-B) Data are reported as mean  $\pm$  SD peak of  
 291 IS20 or IS21 (Conc.  $\mu$ M) at different times (n = 3).

292

293

294

295

296

297

298

299

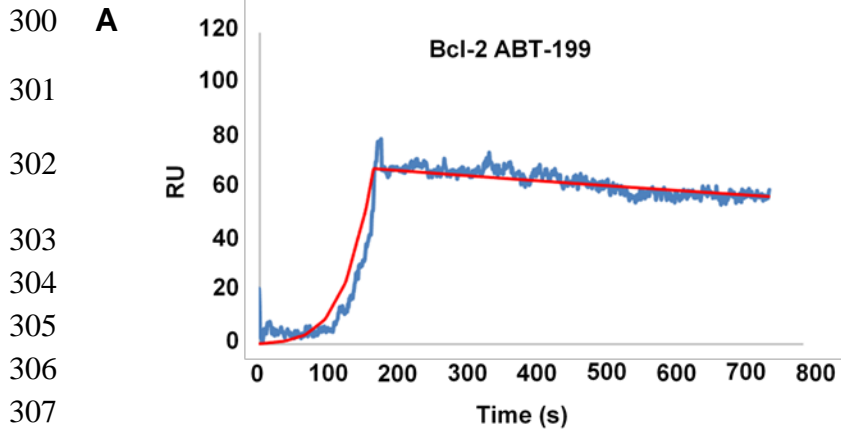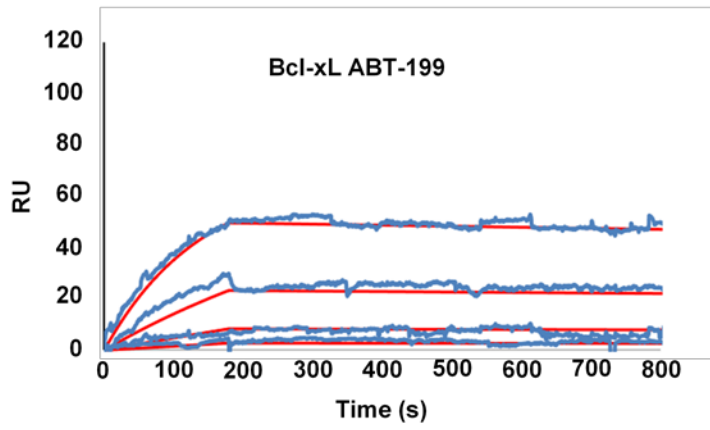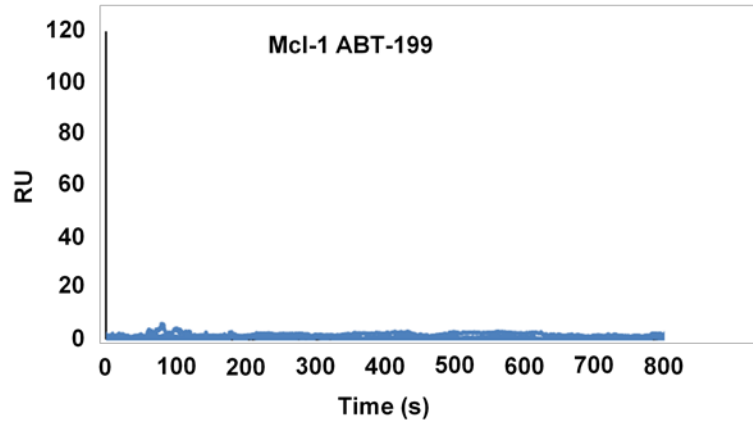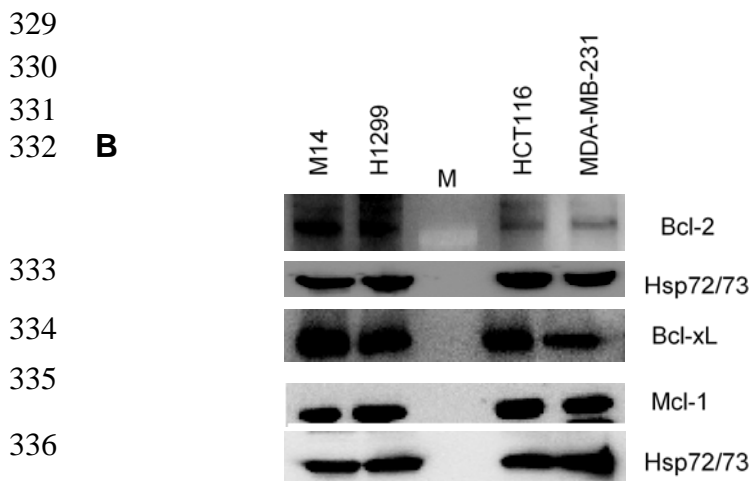

337 **Figure S9.** (A) SPR experiments were carried out on Bcl-2, Bcl-xL and Mcl-1 (ligands)  
 338 immobilized on COOH5 sensorchips, using venetoclax (ABT-199) as analyte. (B) Western blot  
 339 analysis of Bcl-2, Bcl-xL and Mcl-1 proteins expression in M14, H1299, HCT116 and MDA-MB-  
 340 231 cell lines. Reported images are representative of two independent experiments with similar  
 341 results. HSP72/73 is shown as loading and transferring control.

342

343

344 **A**

345

346

347

348

349

350

351

352

353

354

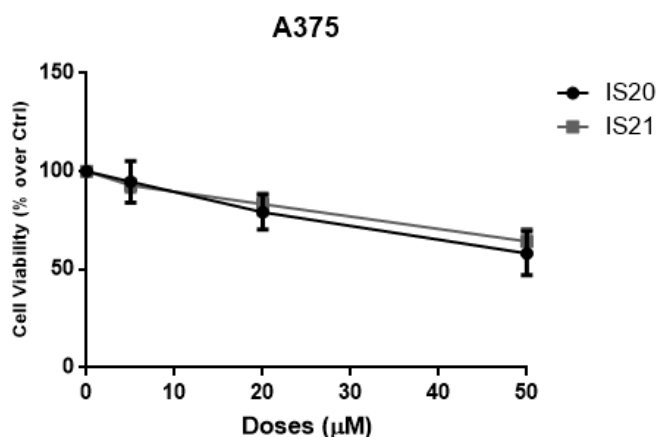

355 **B**

356

357

358

359

360

361

362

363

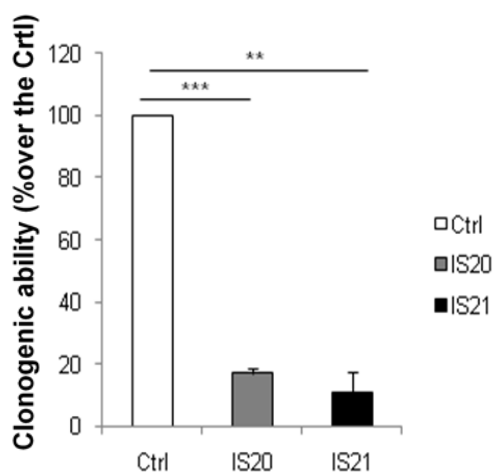

364

365 **C**

366

367

368

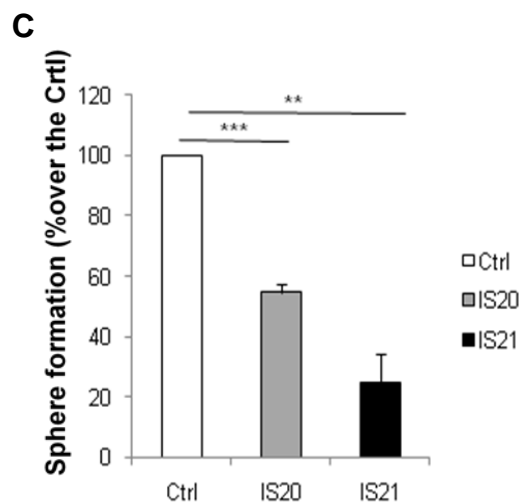

368

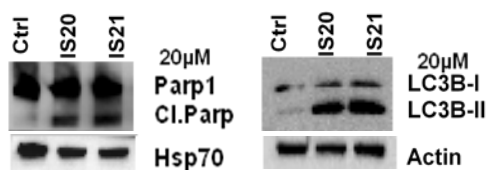

369 **Figure S10. Effect of IS20 and IS21, on viability, clonogenic ability, sphere formation,**  
 370 **apoptosis and autophagy of A375 cells (20  $\mu$ M for 72 h).** (A) Analysis of cell viability by MTT  
 371 assay after treatment with IS20 or IS21. The results are reported as “viability of treated  
 372 cells/viability of control cells (Ctrl)”  $\times$  100. (B) Quantification of clonogenic ability after treatment  
 373 with IS20 or IS21. Results are reported as percentage of clonogenicity of treated versus untreated  
 374 cells (Ctrl). (C) Quantification of tumor sphere formation after treatment with IS20 or IS21. Results  
 375 are reported as percentage of tumor sphere formation of treated versus untreated cells (Ctrl). (B-C)  
 376 Data are reported as mean  $\pm$  SD of three independent experiments. p-values were calculated  
 377 between control (Ctrl) and treated cells, \*\* p < 0.001 and \*\*\* p < 0.0001. (D) Western blot analysis  
 378 of PARP1 cleavage (cl. PARP) and LC3B-I and LC3B-II levels after treatment with IS20 or IS21.  
 379 Reported images are representative of two independent experiments with similar results. HSP72/73  
 380 and Actin are shown as loading and transferring control.

381

382

383

384

385

386

387

388

389

390

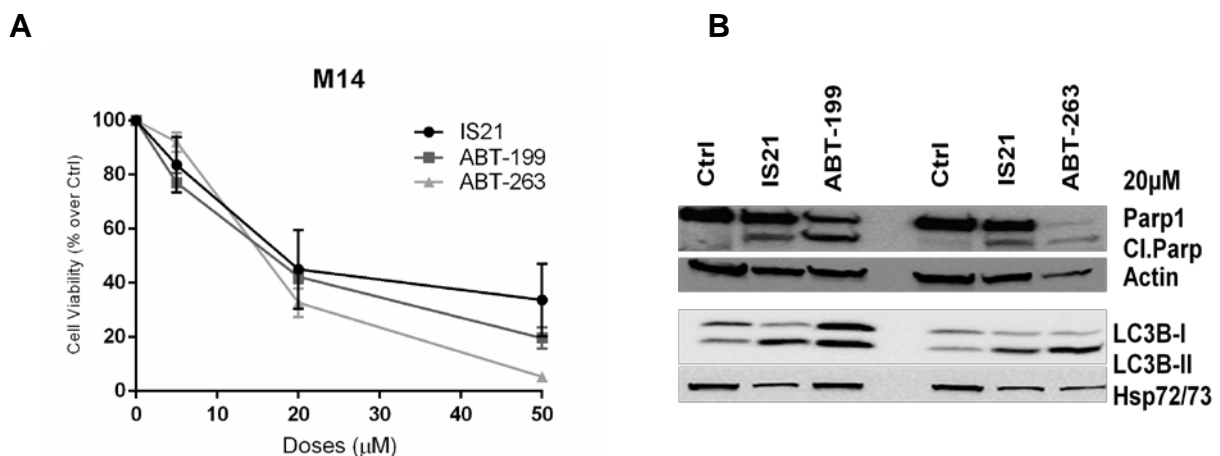

391 **Figure S11. Effect of IS20, IS21, ABT-263 and ABT-199 on viability, apoptosis and autophagy**  
 392 **of M14 cells (20  $\mu$ M for 72 h).** (A) Analysis of cell viability by MTT assay in M14 cells treated  
 393 with IS21, ABT-199 or ABT-263 (20  $\mu$ M for 72 h). (B) Western blot analysis of PARP1 cleavage  
 394 (cl. PARP) and LC3B-I and LC3B-II levels in M14 melanoma cell line treated with IS21, ABT-199  
 395 or ABT-263 (20  $\mu$ M for 72 h). Reported images are representative of two independent experiments  
 396 with similar results. HSP72/73 and Actin are shown as loading and transferring control. (B-C) The  
 397 results are reported as “viability of treated cells/viability of control cells (Ctrl)”  $\times$  100. Data are  
 398 reported as mean  $\pm$  SD of three independent experiments.

399



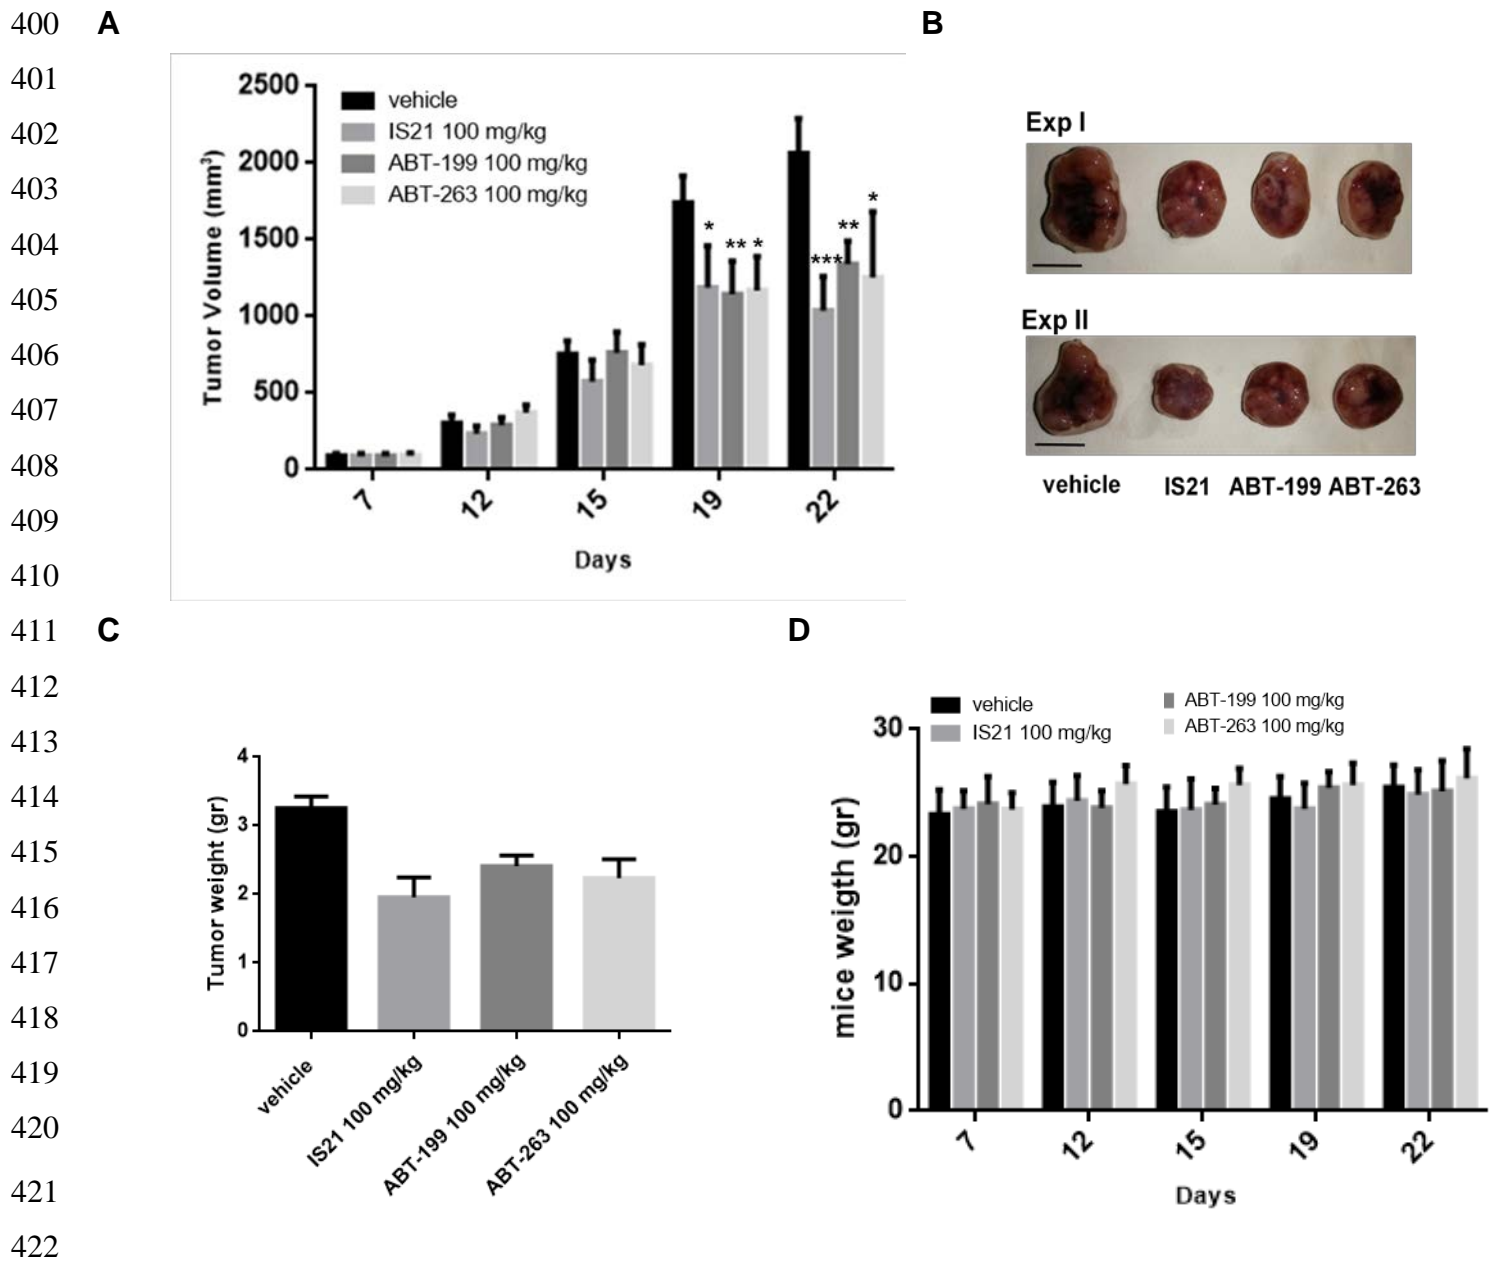

423 **Figure S12. Effect of IS21, ABT-199 and ABT-263 on A375 in vivo tumor growth.** (A) Analysis  
 424 of *in vivo* tumor growth in nude mice injected with A375 cells and treated with vehicle, IS21, ABT-  
 425 199 or with ABT-263 at the indicated concentrations for two weeks. Experiments were repeated  
 426 twice. 4 animals/group. \*  $p < 0.01$ , \*\*  $p < 0.001$ , \*\*\*  $p < 0.0001$ . (B) Representative images of  
 427 explanted tumors of two independent experiments. The scale bar represents 1 cm. (C) Analysis of  
 428 tumor weight after the *in vivo* experiment performed as reported in (A). \*\*  $p \leq 0.001$  calculated as  
 429 the mean of two experiments. (D) Analysis of mice weight after the *in vivo* experiment performed  
 430 as reported in (A). (A,C,D) Data are reported as mean  $\pm$  SD of two independent experiments.

431  
 432  
 433

434 **References**

- 435 1. Pedregosa F, Varoquaux G, Gramfort A, Michel V, Thirion B, Grisel O, et al. Scikit-learn:  
436 Machine Learning in Python. *J Mach Learn Res* 2011;12:2825-30.
- 437 2. Cao J, Kwong S, Wang R, Li X, Li K, Kong X. Class-Specific Soft Voting based Multiple  
438 Extreme Learning Machines Ensemble. *Neurocomputing* 2015;149:275-84.
- 439 3. Quiroga R, Villarreal MA. Vinardo: A Scoring Function Based on Autodock Vina Improves  
440 Scoring, Docking, and Virtual Screening. *PLoS One* 2016;11(5):e0155183.
- 441 4. Korb O, Stutzle T, Exner TE. Empirical scoring functions for advanced protein-ligand  
442 docking with PLANTS. *J Chem Inf Model* 2009;49(1):84-96.
- 443 5. Ragno R, Frasca S, Manetti F, Brizzi A, Massa S. HIV-reverse transcriptase inhibition:  
444 inclusion of ligand-induced fit by cross-docking studies. *J Med Chem* 2005;48(1):200-12.
- 445 6. Liu X, Zhang Y, Huang W, Tan W, Zhang A. Design, synthesis and pharmacological  
446 evaluation of new acyl sulfonamides as potent and selective Bcl-2 inhibitors. *Bioorganic &  
447 Medicinal Chemistry* 2018;26(2):443-54.
- 448 7. Nhu D, Lessene G, Huang DCS, Burns CJ. Small molecules targeting Mcl-1: the search for  
449 a silver bullet in cancer therapy. *MedChemComm* 2016;7(5):778-87.
- 450 8. Stazi G, Battistelli C, Piano V, Mazzone R, Marrocco B, Marchese S, et al. Development of  
451 alkyl glycerone phosphate synthase inhibitors: Structure-activity relationship and effects on  
452 ether lipids and epithelial-mesenchymal transition in cancer cells. *Eur J Med Chem*  
453 2019;163:722-35.
- 454 9. Sabatino M, Rotili D, Patsilnakos A, Forgione M, Tomaselli D, Alby F, et al. Disruptor of  
455 telomeric silencing 1-like (DOT1L): disclosing a new class of non-nucleoside inhibitors by  
456 means of ligand-based and structure-based approaches. *J Comput Aided Mol Des*  
457 2018;32(3):435-58.
- 458 10. Mladenovic M, Patsilnakos A, Pirolli A, Sabatino M, Ragno R. Understanding the  
459 Molecular Determinant of Reversible Human Monoamine Oxidase B Inhibitors Containing  
460 2H-Chromen-2-One Core: Structure-Based and Ligand-Based Derived Three-Dimensional  
461 Quantitative Structure-Activity Relationships Predictive Models. *J Chem Inf Model*  
462 2017;57(4):787-814.
- 463 11. Ragno R, Ballante F, Pirolli A, Wickersham RB, 3rd, Patsilnakos A, Hesse S, et al.  
464 Vascular endothelial growth factor receptor-2 (VEGFR-2) inhibitors: development and  
465 validation of predictive 3-D QSAR models through extensive ligand- and structure-based  
466 approaches. *J Comput Aided Mol Des* 2015;29(8):757-76.
- 467 12. Birkinshaw RW, Gong JN, Luo CS, Lio D, White CA, Anderson MA, et al. Structures of  
468 BCL-2 in complex with venetoclax reveal the molecular basis of resistance mutations. *Nat*  
469 *Commun* 2019;10(1):2385.
- 470 13. Daina A, Michielin O, Zoete V. SwissADME: a free web tool to evaluate pharmacokinetics,  
471 drug-likeness and medicinal chemistry friendliness of small molecules. *Sci Rep*  
472 2017;7:42717.

473
